# Supplementary material for: Trends in mental health related contacts among mothers of Aboriginal children in Western Australia (1990–2013): a linked data population-based cohort study of over 40 000 children
Source: PubMed Central journal article supplement — BMJ Open. 2019 Jul 2;9(7):e027733. doi: 10.1136/bmjopen-2018-027733 (PMC6615791; doi:10.1136/bmjopen-2018-027733), 2019-07-02
Supplement: bmjopen-2018-027733supp001.pdf [file bmjopen-2018-027733supp001.pdf]

- **Appendix A**

**Table A.** Mental health related diagnoses groups.

| <b>Mental Health disorders</b>         | <b>ICD-9-CM</b>                                                                          | <b>ICD-10-AM</b>                                                                                                                                                                |
|----------------------------------------|------------------------------------------------------------------------------------------|---------------------------------------------------------------------------------------------------------------------------------------------------------------------------------|
| Organic disorder                       | 290, 293, 294, 310                                                                       | F00-F09, G30                                                                                                                                                                    |
| Substance-related disorder             | 291, 292, 303, 304, 305                                                                  | F10-F19, F55                                                                                                                                                                    |
| Schizophrenia                          | 295, 296, 297, 298                                                                       | F20-F29, F33.3, F30, F31, F32.1-F32.8, F33.1-F33.9, F34.8, F34.9, F38, F39                                                                                                      |
| Mood disorder                          | 296, 300.4, 311,                                                                         | F32.0, F32.9, F33.0, F34.1                                                                                                                                                      |
| Anxiety                                | 300.0, 300.2, 300.3, 300.8, 308, 309                                                     | F40-F43, F45, F48, F63.3, F68                                                                                                                                                   |
| Personality disorder                   | 301                                                                                      | F60, F61, F62, F68.1, F68.8, F69                                                                                                                                                |
| Intellectual disability (IQ)           | 317, 318, 319                                                                            | F70-F79                                                                                                                                                                         |
| Disorders of psychological development | 299, 307.2, 307.3, 307.6, 307.7, 312, 313, 314, 315                                      | F80-F89, F90-F98                                                                                                                                                                |
| Intentional self-harm                  | E950-E959                                                                                | X6, X7, X80-X84                                                                                                                                                                 |
| Other mental health related contacts   | 300.5, 300.6, 300.7, 300.9, 302, 306, 307.0, 307.1, 307.4, 307.5, 307.8, 307.9, 310, 316 | F44, F48, F50, F51, F52, F53, F54, F59, F63, F64, F65, F66, F95, F98, F99                                                                                                       |
| Broader mental health related contacts | 368.1, 799.2, V11, V15.4, V40, V66.3, V67.3, V70.1, V70.2, V71.0, V79                    | G30, R44, R45, R46, R47, R48, Y10-Y34, Z00.4, Z03.2, Z04.6, Z09.3, Z13.3, Z50.2, Z50.3, Z50.4, Z54.3, Z56, Z59-Z65, Z70, Z71.4, Z71.5, Z71.6, Z71.9, Z86.4, Z86.5, Z91.4, Z91.5 |

**Figure A.** Prevalence of children whose mother had a mental health related contact within 1 year prior to birth, by year of birth and diagnosis type.

**Figure B.** Prevalence of children whose mother had a mental health related contact within 1 year post birth, by year of birth and diagnosis type.
